# Supplementary material for: MSC.sTRAIL Has Better Efficacy than MSC.FL-TRAIL and in Combination with AKTi Blocks Pro-Metastatic Cytokine Production in Prostate Cancer Cells
Source: PubMed Central journal article supplement (PMC6521093; doi:10.3390/cancers11040568), 2019-04-21
Supplement: cancers-11-00568-s001.pdf [file cancers-11-00568-s001.pdf]

# Supplementary Material: MSC.sTRAIL Has Better Efficacy than MSC.FL-TRAIL and in Combination with AKTi Blocks Pro-Metastatic Cytokine Production in Prostate Cancer Cells

Andrea Mohr, Tianyuan Chu, Greg N. Brooke and Ralf M. Zwacka

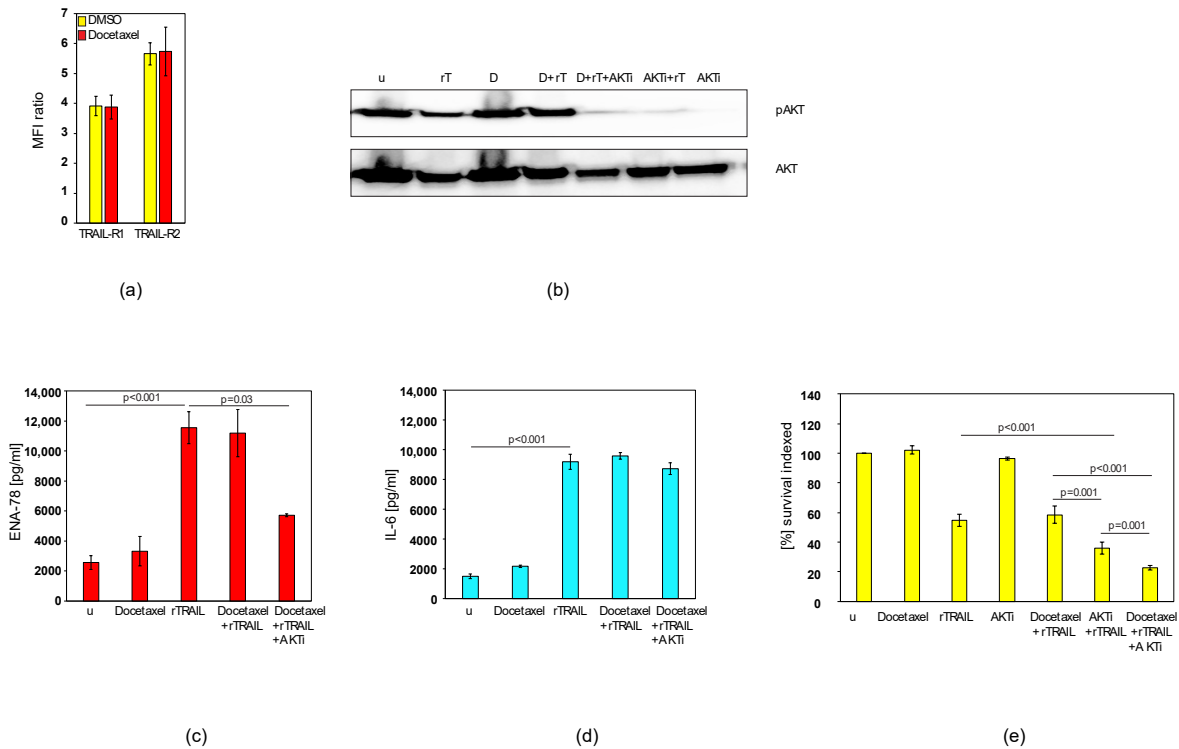

**Figure S1.** TRAIL-receptor expression, AKT phosphorylation and triple treatments. **(a)** Mean Fluorescence intensity ratios of TRAIL-R1 and TRAIL-2 on PC3 cells treated with docetaxel or with vehicle (DMSO) for 48 h. **(b)** Western blot of PC3 cell protein lysates that were treated with the indicated cocktails or left untreated (u) and probed with a phosphorylation specific AKT antibody and a complete AKT antibody as control. **(c)** CXCL5/ENA-78 ELISA results of supernatants of untreated PC3 cells (u), PC3 cells treated with docetaxel, treated with rTRAIL, treated with a mix of docetaxel and rTRAIL or a mix of docetaxel, rTRAIL and AKTi. **(d)** IL-6 ELISA results of supernatants of untreated PC3 cells (u), PC3 cells treated with docetaxel, treated with rTRAIL, treated with a mix of docetaxel and rTRAIL or a mix of docetaxel, rTRAIL and AKTi. **(e)** Survival of untreated PC3 cells (u), PC3 cells treated with docetaxel, treated with rTRAIL, treated with a mix of docetaxel and rTRAIL or a mix of docetaxel, rTRAIL and AKTi.

|           |          |       |              |                  |               |                 |        |           |        |              |           |
|-----------|----------|-------|--------------|------------------|---------------|-----------------|--------|-----------|--------|--------------|-----------|
| POS       | POS      | NEG   | NEG          | ENA-78<br>142.63 | G-CSF<br>0.6  | GM-CSF<br>42.48 | GRO    | GRO alpha | I-309  | IL-1 alpha   | IL-1 beta |
| IL-2      | IL-3     | IL-4  | IL-5<br>1.95 | IL-6<br>287.46   | IL-7<br>31.66 | IL-8            | IL-10  | IL-12     | IL-13  | IL-15        | IFN-gamma |
| MCP-1     | MCP-2    | MCP-3 | M-CSF        | MDC              | MIG<br>0.78   | MIP-1           | RANTES | SCF       | SDF    | TARC<br>2.03 | TGF       |
| TNF-alpha | TNF-beta | EGF   | IGF          | Angiogenin       | OSM           | TPO             | VEGF-A | PDGF-BB   | Leptin | NEG          | POS       |

**Figure S2.** Cytokine Array indicating the order of cytokines on the array. Induced cytokines are boxed in red. Values depicted in these red boxes represent the upregulation in [%].

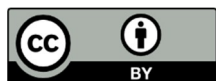

© 2019 by the authors. Licensee MDPI, Basel, Switzerland. This article is an open access article distributed under the terms and conditions of the Creative Commons Attribution (CC BY) license (<http://creativecommons.org/licenses/by/4.0/>).
